# Supplementary material for: Culturally adapting internet- and mobile-based health promotion interventions might not be worth the effort: a systematic review and meta-analysis
Source: PubMed Central journal article supplement (PMC8943001; doi:10.1038/s41746-022-00569-x), 2022-03-23
Supplement: 41746_2022_569_MOESM1_ESM.pdf [file 41746_2022_569_MOESM1_ESM.pdf]

## *Supplementary Material*

### 1 Changes to study protocol

- 1.1 Pre-defined sensitivity and subgroup analyses were not performed due to low number of included studies, n=9.
- 1.2 A search update included the additional database of Web of Science.

### 2 Supplementary Tables

#### 2.1 Supplementary Table 1

| <b>Supplementary Table 1. Individual data points of the studies reporting continues outcomes</b>         |        |         |        |         |        |        |
|----------------------------------------------------------------------------------------------------------|--------|---------|--------|---------|--------|--------|
| Studies reporting continues outcomes of long-term effectiveness comparing to active control conditions   |        |         |        |         |        |        |
| First author (Year)                                                                                      | IG (M) | IG (SD) | WL (M) | WL (SD) | IG (N) | WL (N) |
| Bender 2017                                                                                              | 9524   | 773.06  | 7208   | 566.95  | 22     | 23     |
| Kurth 2016                                                                                               | 0.32   | 0.84    | 0.31   | 0.83    | 205    | 200    |
| Larsen 2020                                                                                              | 60.93  | 44.64   | 60.56  | 92.26   | 22     | 24     |
| Marcus 2016                                                                                              | 112.8  | 97.1    | 63.5   | 88.7    | 104    | 101    |
| Fortmann 2017                                                                                            | 31.9   | 5.4     | 32.1   | 6.6     | 50     | 58     |
| Montag 2015                                                                                              | 1.64   | 5.76    | 1.99   | 5.26    | 110    | 131    |
| Studies reporting continues outcomes of short-term effectiveness comparing to active control conditions  |        |         |        |         |        |        |
| Bender 2017                                                                                              | 7483   | 2415    | 6735   | 2363    | 22     | 23     |
| Kurth 2016                                                                                               | 0.42   | 0.71    | 0.37   | 0.73    | 220    | 209    |
| Fortmann 2017                                                                                            | 31.7   | 5.2     | 32     | 6.1     | 49     | 57     |
| Montag 2015                                                                                              | 0.98   | 2.48    | 1.94   | 3.74    | 91     | 97     |
| Studies reporting continues outcomes of short-term effectiveness comparing to passive control conditions |        |         |        |         |        |        |
| Brito Beck da Silva 2019                                                                                 | 20.95  | 4.17    | 20.61  | 3.79    | 285    | 317    |
| Duan 2017                                                                                                | 557.51 | 417.51  | 499.19 | 470.3   | 88     | 54     |
| Lau 2019                                                                                                 | 18.75  | 10.57   | 23.81  | 13.34   | 13     | 16     |
| <i>IG</i> : intervention group, <i>WL</i> : waitlist, <i>M</i> : mean, <i>SD</i> : standard deviation    |        |         |        |         |        |        |
